# Supplementary material
Source: PubMed Central journal article supplement (PMC8887995)
Supplement: bloodBLD2021010958-suppl1.pdf [file bloodBLD2021010958-suppl1.pdf]

**Supplementary Figure1: BCOR exons sequences.** Schematic representation of BCOR exon sequences and corresponding functional domains of BCOR protein.

**Supplementary Figure2: Characterization of BCOR gene mutation in heamatological cancer.** A) Pie chart indicating the different types of BCOR mutations detected in heamtological cancer. B) Frequency of mutations in each BCOR exon detected heamtological cancer.

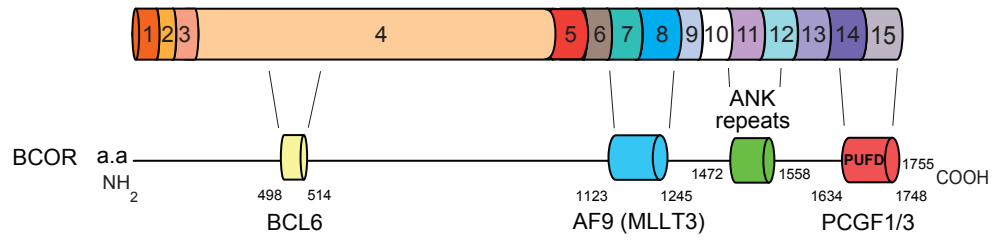

**Supplementary Figure 1.**

**A**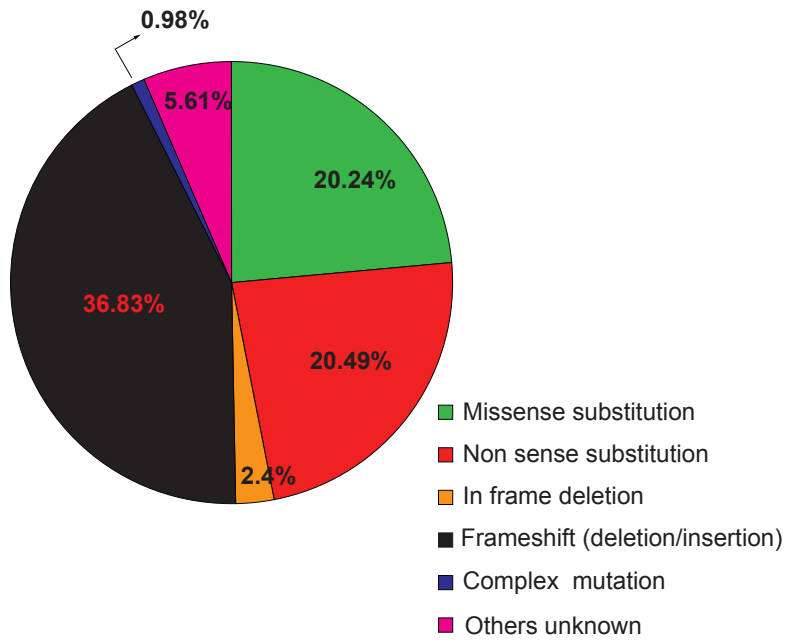**B**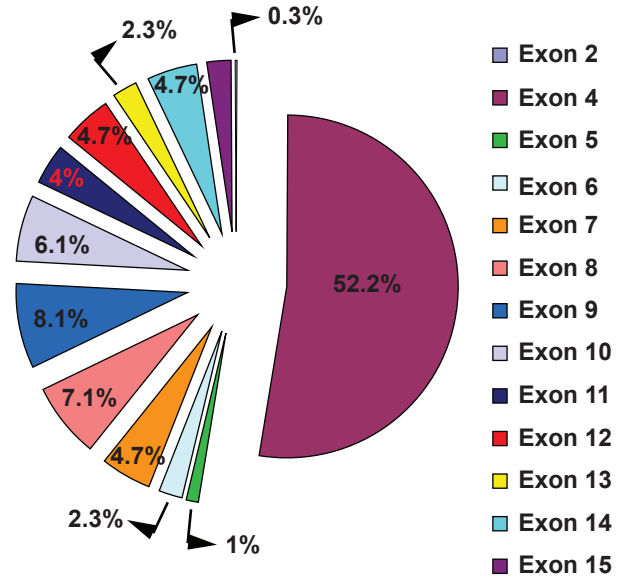

Supplementary Figure 2.

| TUMOR             | SUBGROUP                                                 | EXON | Position a.a. | MUTATION | MUTATION TYPE              | Pubmed                                          |
|-------------------|----------------------------------------------------------|------|---------------|----------|----------------------------|-------------------------------------------------|
| Lymphoid neoplasm | Diffuse Large B cell Lymphoma                            | 4    | 334           | P334A    | Substitution Missense      | 29386642                                        |
| Lymphoid neoplasm | Diffuse Large B cell Lymphoma                            | 4    | 452           | A452=    | Substitution-coding silent | NA                                              |
| Lymphoid neoplasm | Diffuse Large B cell Lymphoma                            | 4    | 479           | G479R    | Substitution Missense      | 29386642;<br>24030381                           |
| Lymphoid neoplasm | Diffuse Large B cell Lymphoma                            | 4    | 594           | V594I    | Substitution Missense      | 29386642;<br>25800665                           |
| Lymphoid neoplasm | Diffuse Large B cell Lymphoma                            | 4    | 720           | L720V    | Substitution Missense      | 29386642                                        |
| Lymphoid neoplasm | Diffuse Large B cell Lymphoma                            | 4    | 918           | Q918H    | Deletion-Frameshift        | 28481359                                        |
| Lymphoid neoplasm | Diffuse Large B cell Lymphoma                            | 4    | 956           | K956N    | Substitution Missense      | 24531327                                        |
| Lymphoid neoplasm | Diffuse Large B cell Lymphoma                            | 8    | 1171          | P1171S   | Substitution Missense      | 26608593                                        |
| Lymphoid neoplasm | Diffuse Large B cell Lymphoma                            | 11   | 1502          | D1502N   | Substitution Missense      | 26608593                                        |
| Lymphoid neoplasm | Diffuse Large B cell Lymphoma                            | 12   | 1547          | D1547N   | Substitution Missense      | 26773734                                        |
| Lymphoid neoplasm | Diffuse Large B cell Lymphoma                            | 15   | 1664          | Y1664*   | Substitution-Nonsense      | 28481359,<br>27276561                           |
| Lymphoid neoplasm | Diffuse Large B cell Lymphoma                            | 15   | 1698          | E1698*   | Substitution-Nonsense      | 26647218                                        |
| Lymphoid neoplasm | Diffuse Large B cell Lymphoma                            | 15   | 1702          | L1702A   | Deletion-Frameshift        | 26608593                                        |
| Lymphoid neoplasm | Anaplastic Large cell Lymphoma in situ                   | 4    | 191           | W191*    | Substitution-Nonsense      | 31774495                                        |
| Lymphoid neoplasm | Breast implant associated anaplastic large cell lymphoma | 10   | 1475          | W1475*   | Substitution-Nonsense      | 30546832                                        |
| Lymphoid neoplasm | B cell Lymphoma unspecified                              | 4    | 417           | D417E    | Deletion-Frameshift        | 28481359                                        |
| Lymphoid neoplasm | B cell Lymphoma unspecified                              | 4    | 907           | S907N    | Substitution Missense      | 28481359                                        |
| Lymphoid neoplasm | Follicular Lymphoma                                      | 4    | 446           | K446I    | Substitution Missense      | 28481359                                        |
| Lymphoid neoplasm | Follicular Lymphoma                                      | 5    | 1013          | A1013T   | Substitution Missense      | 28481359,<br>28671688                           |
| Lymphoid neoplasm | Mantle cell lymphoma                                     | 12   | 1543          | K1543I   | Insertion-Frameshift       | 28481359                                        |
| Lymphoid neoplasm | Mantle cell lymphoma                                     | 13   | 1596          | D1596=   | Substitution-coding silent | 29386642                                        |
| Lymphoid neoplasm | Hodgkin Lymphoma                                         | 4    | 780           | P780R    | Substitution Missense      | 29386642                                        |
| Lymphoid neoplasm | CLL/Small lymphocytic lymphoma                           | 4    | 133           | E133Gfs* | Deletion-Frameshift        | 24850867                                        |
| Lymphoid neoplasm | CLL/Small lymphocytic lymphoma                           | 4    | 200           | T200N    | Insertion-Frameshift       | 23415222                                        |
| Lymphoid neoplasm | CLL/Small lymphocytic lymphoma                           | 4    | 395           | K395*    | Substitution-Nonsense      | NA                                              |
| Lymphoid neoplasm | CLL/Small lymphocytic lymphoma                           | 4    | 400           | G400A    | Deletion-Frameshift        | 27959900                                        |
| Lymphoid neoplasm | CLL/Small lymphocytic lymphoma                           | 4    | 463           | P463H    | Deletion-Frameshift        | 23415222                                        |
| Lymphoid neoplasm | CLL/Small lymphocytic lymphoma                           | 4    | 487           | L487I    | Deletion-Frameshift        | 25382417                                        |
| Lymphoid neoplasm | CLL/Small lymphocytic lymphoma                           | 4    | 536           | I536D    | Insertion-Frameshift       | 26675346                                        |
| Lymphoid neoplasm | CLL/Small lymphocytic lymphoma                           | 4    | 657           | Y657*    | Substitution-Nonsense      | 22158541;<br>26728869                           |
| Lymphoid neoplasm | CLL/Small lymphocytic lymphoma                           | 4    | 657           | Y657L    | Deletion-Frameshift        | NA                                              |
| Lymphoid neoplasm | CLL/Small lymphocytic lymphoma                           | 4    | 726           | H726L    | Insertion-Frameshift       | NA                                              |
| Lymphoid neoplasm | CLL/Small lymphocytic lymphoma                           | 4    | 839           | K839*    | Substitution-Nonsense      | 25382417                                        |
| Lymphoid neoplasm | CLL/Small lymphocytic lymphoma                           | 4    | 881           | D881E    | Deletion-Frameshift        | NA                                              |
| Lymphoid neoplasm | CLL/Small lymphocytic lymphoma                           | 7    | 1136          | R1136H   | Substitution Missense      | 27959900                                        |
| Lymphoid neoplasm | CLL/Small lymphocytic lymphoma                           | 7    | 1138          | V1138S   | Deletion-Frameshift        | 25382417                                        |
| Lymphoid neoplasm | CLL/Small lymphocytic lymphoma                           | 8    | 1183          | R1183*   | Substitution-Nonsense      | 27288520,<br>27276561,<br>24030381              |
| Lymphoid neoplasm | CLL/Small lymphocytic lymphoma                           | 8    | 1228          | A1228E   | Substitution Missense      | 30807786                                        |
| Lymphoid neoplasm | CLL/Small lymphocytic lymphoma                           | 9    | 1348          | E1348*   | Substitution-Nonsense      | 23415222                                        |
| Lymphoid neoplasm | CLL/Small lymphocytic lymphoma                           | 12   | 1541          | M1541R   | Deletion-Frameshift        | 27959900                                        |
| Lymphoid neoplasm | NK-T cell Lymphoma                                       | 4    | 278           | P278fs*  | Frameshift                 | 26773734                                        |
| Lymphoid neoplasm | NK-T cell Lymphoma                                       | 4    | 342           | R342*    | Substitution-Nonsense      | 22012066;<br>30304655;<br>26773734;<br>29515765 |
| Lymphoid neoplasm | NK-T cell Lymphoma                                       | 4    | 348           | Q348*    | Substitution-Nonsense      | NA                                              |
| Lymphoid neoplasm | NK-T cell Lymphoma                                       | 4    | 735           | I735*    | Deletion-Frameshift        | 26773734                                        |
| Lymphoid neoplasm | NK-T cell Lymphoma                                       | 4    | 795           | K795R    | Deletion-Frameshift        | 26773734                                        |
| Lymphoid neoplasm | NK-T cell Lymphoma                                       | 4    | 881           | D881E    | Deletion-Frameshift        | NA                                              |
| Lymphoid neoplasm | NK-T cell Lymphoma                                       | 4    | 940           | T940Y    | Insertion-Frameshift       | 26773734                                        |
| Lymphoid neoplasm | NK-T cell Lymphoma                                       | 12   | 1549          | L1549K   | Deletion-Frameshift        | 26773734                                        |
| Lymphoid neoplasm | NK cell Leukemia                                         | 4    | 191           | W191*    | Substitution-Nonsense      | 29674644                                        |
| Lymphoid neoplasm | NK cell Leukemia                                         | 4    | 702           | L702C    | Deletion-Frameshift        | 29674644;<br>27276561                           |
| Lymphoid neoplasm | HCL                                                      | 9    | 1337          | Q1337*   | Substitution-Nonsense      | 24241536                                        |
| Lymphoid neoplasm | HCL                                                      | 10   | 1430          | E1430*   | Substitution-Nonsense      | 29989227                                        |
| Lymphoid neoplasm | ALL                                                      | 4    | 154           | G154E    | Substitution-Nonsense      | 23856246                                        |
| Lymphoid neoplasm | ALL                                                      | 15   | 1721          | W1721*   | Substitution-Nonsense      | 23334668                                        |
| Lymphoid neoplasm | B cell Prolymphocytic leukemia                           | 4    | 924           | F924C    | Substitution Missense      | 31527074                                        |
| Lymphoid neoplasm | B cell Prolymphocytic leukemia                           | 8    | 1260          | K1260N   | Substitution Missense      | 28481359                                        |
| Lymphoid neoplasm | B cell Prolymphocytic leukemia                           | 14   | 1614          | P1614T   | Insertion-Frameshift       | 31527074                                        |
| Lymphoid neoplasm | T cell Prolymphocytic leukemia                           | 4    | 165           | A165P    | Substitution Missense      | 26917488                                        |
| Lymphoid neoplasm | T cell Prolymphocytic leukemia                           | 4    | 896           | V896L    | Substitution Missense      | 26917488                                        |
| Lymphoid neoplasm | T-ALL                                                    | 4    | 128           | T128I    | Substitution Missense      | 25595890                                        |
| Lymphoid neoplasm | T-ALL                                                    | 4    | 421           | G421L    | Insertion-Frameshift       | 28157215                                        |
| Lymphoid neoplasm | T-ALL                                                    | 4    | 421           | G421R    | Substitution Missense      | 28157215                                        |

|                   |                                |    |      |           |                            |                                                 |
|-------------------|--------------------------------|----|------|-----------|----------------------------|-------------------------------------------------|
| Lymphoid neoplasm | T-ALL                          | 4  | 430  | Q430H     | Substitution Missense      | 28157215                                        |
| Lymphoid neoplasm | T-ALL                          | 4  | 861  | R861H     | Substitution Missense      | 28157215                                        |
| Lymphoid neoplasm | T-ALL                          | 5  | 1013 | A1013T    | Substitution Missense      | 28481359,<br>28671688                           |
| Lymphoid neoplasm | T-ALL                          | 6  | 1042 | E1042D    | Deletion-Frameshift        | 28157215                                        |
| Lymphoid neoplasm | T-ALL                          | 6  | 1050 | D1050N    | Substitution Missense      | 25595880                                        |
| Lymphoid neoplasm | T-ALL                          | 8  | 1175 | R1175T    | Insertion-Frameshift       | 23263491                                        |
| Lymphoid neoplasm | T-ALL                          | 8  | 1190 | A1190V    | Insertion-Frameshift       | 28157215                                        |
| Lymphoid neoplasm | T-ALL                          | 9  | 1341 | R1341W    | Substitution Missense      | 25595890                                        |
| Lymphoid neoplasm | T-ALL                          | 10 | 1425 | N1425S    | Substitution Missense      | 28671688                                        |
| Lymphoid neoplasm | T-ALL                          | 10 | 1426 | K1426E    | Substitution Missense      | 28671688                                        |
| Lymphoid neoplasm | T-ALL                          | 10 | 1448 | C1448=    | Substitution-coding silent | 31697823                                        |
| Lymphoid neoplasm | Plasmacytoma                   | 4  | 312  | Q312del   | Deletion-In frame          | 30545397                                        |
| Lymphoid neoplasm | Plasma cell Myeloma            | 4  | 252  | Y252=     | Substitution-coding silent | 30545397                                        |
| Lymphoid neoplasm | Plasma cell Myeloma            | 7  | 1157 | L1157=    | Substitution-coding silent | 30545397                                        |
| Myeloid neoplasm  | Myelofibrosis                  | 4  | 435  | D435R     | Deletion-Frameshift        | 30304655                                        |
| Myeloid neoplasm  | Myelofibrosis                  | 7  | 1137 | K1137S    | Deletion-Frameshift        | 30304655                                        |
| Myeloid neoplasm  | Polycythaemia Vera             | 4  | 342  | R342*     | Substitution-Nonsense      | 22012066;<br>30304655;<br>26773734;<br>29515765 |
| Myeloid neoplasm  | Polycythaemia Vera             | 4  | 797  | V797C     | Deletion-Frameshift        | 30304655                                        |
| Myeloid neoplasm  | Polycythaemia Vera             | 6  | 1050 | D1050G    | Deletion-Frameshift        | 30304655                                        |
| Myeloid neoplasm  | Essential thrombocythaemia     | 14 | 1650 | F1650C    | Substitution Missense      | 30304655                                        |
| Myeloid neoplasm  | Chronic Eosinophilic Leukemia  | 4  | 154  | G154E*fs7 | Deletion-Frameshift        | 27174585                                        |
| Myeloid neoplasm  | MDS/Myeloproliferative disease | 8  | 1263 | S1263I    | Deletion-Frameshift        | 26728869                                        |
| Myeloid neoplasm  | MDS Therapy related            | 14 | 1629 | W1629*    | Substitution-Nonsense      | 29386642                                        |
| Myeloid neoplasm  | MDS                            | 2  | 5    | T5xf*     | Frameshift                 | 24047651                                        |
| Myeloid neoplasm  | MDS                            | 4  | 63   | R63K      | Substitution Missense      | 24030381                                        |
| Myeloid neoplasm  | MDS                            | 4  | 151  | T151D     | Insertion-Frameshift       | 27127180                                        |
| Myeloid neoplasm  | MDS                            | 4  | 222  | L222Y     | Deletion-Frameshift        | 24030381                                        |
| Myeloid neoplasm  | MDS                            | 4  | 224  | Q224*     | Substitution-Nonsense      | 24030381                                        |
| Myeloid neoplasm  | MDS                            | 4  | 231  | Q231fs*   | Frameshift                 | 27884971                                        |
| Myeloid neoplasm  | MDS                            | 4  | 286  | S286A     | Deletion-Frameshift        | 26728869                                        |
| Myeloid neoplasm  | MDS                            | 4  | 312  | Q312*     | Substitution-Nonsense      | 24030381                                        |
| Myeloid neoplasm  | MDS                            | 4  | 421  | G421V     | Substitution Missense      | 24030381                                        |
| Myeloid neoplasm  | MDS                            | 4  | 462  | A462L     | Deletion-Frameshift        | 29515765                                        |
| Myeloid neoplasm  | MDS                            | 4  | 479  | G479R     | Substitution Missense      | 29386642;<br>24030381                           |
| Myeloid neoplasm  | MDS                            | 4  | 463  | P463S     | Insertion-Frameshift       | 27628869                                        |
| Myeloid neoplasm  | MDS                            | 4  | 534  | W534*     | Substitution-Nonsense      | 27047651                                        |
| Myeloid neoplasm  | MDS                            | 4  | 534  | W534Xfs*  | Frameshift                 | 27047651                                        |
| Myeloid neoplasm  | MDS                            | 4  | 594  | V594I     | Substitution Missense      | 29386642;<br>25800665                           |
| Myeloid neoplasm  | MDS                            | 4  | 637  | 637fs*    | Unknown                    | 24850867                                        |
| Myeloid neoplasm  | MDS                            | 4  | 657  | Y657*     | Substitution-Nonsense      | 22158541;<br>26728869                           |
| Myeloid neoplasm  | MDS                            | 4  | 663  | P663T     | Substitution Missense      | 24030381                                        |
| Myeloid neoplasm  | MDS                            | 4  | 693  | P693S     | Insertion-Frameshift       | 30083851                                        |
| Myeloid neoplasm  | MDS                            | 4  | 711  | P711Q     | Deletion-Frameshift        | 24030381                                        |
| Myeloid neoplasm  | MDS                            | 4  | 738  | T738K     | Insertion-Frameshift       | 29515765                                        |
| Myeloid neoplasm  | MDS                            | 4  | 788  | N788K     | Substitution Missense      | 27122718                                        |
| Myeloid neoplasm  | MDS                            | 4  | 839  | K839Q     | Insertion-Frameshift       | 27288520;<br>24030381                           |
| Myeloid neoplasm  | MDS                            | 4  | 840  | P840S     | Substitution Missense      | 24030381                                        |
| Myeloid neoplasm  | MDS                            | 4  | 861  | R861X     | Frameshift                 | 24047651                                        |
| Myeloid neoplasm  | MDS                            | 4  | 870  | T870X     | Frameshift                 | 24850867                                        |
| Myeloid neoplasm  | MDS                            | 4  | 921  | P921X     | Frameshift                 | 24850867                                        |
| Myeloid neoplasm  | MDS                            | 4  | 967  | A967V     | Substitution Missense      | 24030381                                        |
| Myeloid neoplasm  | MDS                            | 4  | 997  | A997H     | Deletion-Frameshift        | 29780592                                        |
| Myeloid neoplasm  | MDS                            | 6  | 1040 | D1040X    | Frameshift                 | 24047651                                        |
| Myeloid neoplasm  | MDS                            | 7  | 1105 | Y1105*    | Substitution-Nonsense      | 24850867                                        |
| Myeloid neoplasm  | MDS                            | 7  | 1108 | E1108*    | Substitution-Nonsense      | 27276561                                        |
| Myeloid neoplasm  | MDS                            | 7  | 1163 | R1163*    | Substitution-Nonsense      | 24047651                                        |
| Myeloid neoplasm  | MDS                            | 8  | 1174 | Q1174T    | Insertion-Frameshift       | 27881874;<br>24030381                           |
| Myeloid neoplasm  | MDS                            | 8  | 1194 | K1194R    | Substitution Missense      | 24030381                                        |
| Myeloid neoplasm  | MDS                            | 8  | 1239 | E1239X    | Frameshift                 | 24850867                                        |
| Myeloid neoplasm  | MDS                            | 8  | 1262 | L1262X    | Frameshift                 | 24047651                                        |
| Myeloid neoplasm  | MDS                            | 8  | 1282 | R1282T    | Deletion-Frameshift        | 24030381                                        |
| Myeloid neoplasm  | MDS                            | 9  | 1299 | L1299X    | Frameshift                 | 24850867                                        |
| Myeloid neoplasm  | MDS                            | 9  | 1303 | E1303X    | Frameshift                 | 24850867                                        |
| Myeloid neoplasm  | MDS                            | 9  | 1333 | H1333D    | Substitution Missense      | 24030381                                        |
| Myeloid neoplasm  | MDS                            | 9  | 1341 | R1341Q    | Substitution Missense      | 24030381                                        |
| Myeloid neoplasm  | MDS                            | 9  | 1342 | G1342*    | Substitution-Nonsense      | 24047651                                        |

|                  |                                       |    |      |            |                            |                                                 |
|------------------|---------------------------------------|----|------|------------|----------------------------|-------------------------------------------------|
| Myeloid neoplasm | MDS                                   | 9  | 1351 | V1351R     | Insertion-Frameshift       | 21909114                                        |
| Myeloid neoplasm | MDS                                   | 9  | 1351 | V1351G     | Insertion-Frameshift       | 21909114                                        |
| Myeloid neoplasm | MDS                                   | 9  | 1351 | V1351X     | Frameshift                 | 24047651                                        |
| Myeloid neoplasm | MDS                                   | 9  | 1361 | R1361Q     | Substitution Missense      | 24030381                                        |
| Myeloid neoplasm | MDS                                   | 10 | 1396 | Q1396*     | Substitution-Nonsense      | 29515765                                        |
| Myeloid neoplasm | MDS                                   | 10 | 1435 | R1435W     | Substitution Missense      | 24030381                                        |
| Myeloid neoplasm | MDS                                   | 10 | 1474 | G1474X     | Frameshift                 | 24850867                                        |
| Myeloid neoplasm | MDS                                   | 11 | 1480 | R1480*     | Substitution-Nonsense      | 24030381                                        |
| Myeloid neoplasm | MDS                                   | 11 | 1494 | Q1494*     | Substitution-Nonsense      | 24030381                                        |
| Myeloid neoplasm | MDS                                   | 11 | 1503 | A1503T     | Substitution Missense      | 24030381                                        |
| Myeloid neoplasm | MDS                                   | 11 | 1507 | D1507X     | Frameshift                 | 24047651                                        |
| Myeloid neoplasm | MDS                                   | 11 | 1513 | R1513*     | Substitution-Nonsense      | 24850867                                        |
| Myeloid neoplasm | MDS                                   | 12 | 1566 | F1566del   | Deletion in frame          | 24030381                                        |
| Myeloid neoplasm | MDS                                   | 12 | 1572 | C1572W     | Deletion-Frameshift        | 24030381                                        |
| Myeloid neoplasm | MDS                                   | 13 | 1582 | V1582X     | Frameshift                 | 24047651                                        |
| Myeloid neoplasm | MDS                                   | 13 | 1587 | P1587Q     | Deletion-Frameshift        | 24030381                                        |
| Myeloid neoplasm | MDS                                   | 14 | 1612 | L1612P     | Deletion-Frameshift        | 26728869                                        |
| Myeloid neoplasm | MDS                                   | 14 | 1614 | P1614X     | Frameshift                 | 24850867                                        |
| Myeloid neoplasm | MDS                                   | 15 | 1680 | E1680*     | Substitution-Nonsense      | 26728869                                        |
| Myeloid neoplasm | Blast phase chronic myeloid leukaemia | 10 | 1412 | S1412V     | Insertion-Frameshift       | 35381062                                        |
| Myeloid neoplasm | CMML                                  | 4  | 342  | R342*      | Substitution-Nonsense      | 22012066;<br>30304655;<br>26773734;<br>29515765 |
| Myeloid neoplasm | CMML                                  | 4  | 542  | S542*      | Substitution-Nonsense      | 27628869                                        |
| Myeloid neoplasm | CMML                                  | 4  | 670  | P670S      | Substitution Missense      | 27486981                                        |
| Myeloid neoplasm | CMML                                  | 4  | 890  | E890R      | Deletion-Frameshift        | 26648538                                        |
| Myeloid neoplasm | CMML                                  | 4  | 941  | K941*      | Substitution-Nonsense      | 24047651                                        |
| Myeloid neoplasm | CMML                                  | 4  | 995  | Q995*      | Substitution-Nonsense      | 24047651                                        |
| Myeloid neoplasm | CMML                                  | 8  | 1187 | Q1187*     | Substitution-Nonsense      | 21909114                                        |
| Myeloid neoplasm | CMML                                  | 8  | 1222 | K1222N     | Insertion-Frameshift       | 29515765                                        |
| Myeloid neoplasm | CMML                                  | 11 | 1510 | E1510K     | Substitution Missense      | 24030381                                        |
| Myeloid neoplasm | CMML                                  | 12 | 1572 | C1572X     | Frameshift                 | 24047651                                        |
| Myeloid neoplasm | CMML                                  | 13 | 1589 | P1589T     | Insertion-Frameshift       | 29515765                                        |
| Myeloid neoplasm | CMML                                  | 14 | 1610 | T1610I     | Substitution Missense      | 24030381                                        |
| Myeloid neoplasm | CML                                   | 4  | 214  | S214S      | Substitution-coding silent | 27733357                                        |
| Myeloid neoplasm | CML                                   | 4  | 549  | G549S      | Substitution Missense      | 27733357                                        |
| Myeloid neoplasm | CML                                   | 4  | 906  | G906fs     | Insertion-Frameshift       | 32045476                                        |
| Myeloid neoplasm | AML Therapy related                   | 4  | 826  | F826A      | Insertion-Frameshift       | 29386642                                        |
| Myeloid neoplasm | AML Therapy related                   | 4  | 826  | F826A      | Insertion-Frameshift       | 29386642                                        |
| Myeloid neoplasm | AML Therapy related                   | 12 | 1564 | W1564L     | Insertion-Frameshift       | 29386642                                        |
| Myeloid neoplasm | AML Therapy related                   | 12 | 1580 | Y1580*     | Insertion-Frameshift       | 27288520                                        |
| Myeloid neoplasm | AML associated with MDS               | 10 | 1462 | A1462P     | Substitution Missense      | 27884971                                        |
| Myeloid neoplasm | AML associated with MDS               | 14 | 1612 | L1612P     | Insertion-Frameshift       | 22012066,<br>27288520,<br>24030381              |
| Myeloid neoplasm | AML associated with MDS               | 4  | 629  | N629S      | Substitution-Nonsense      | 24030381                                        |
| Myeloid neoplasm | AML associated with MDS               | 5  | 1002 | G1002A     | Insertion-Frameshift       | 24030381                                        |
| Myeloid neoplasm | AML/MDS                               | 4  | 336  | S336L      | Insertion-Frameshift       | 25381062;<br>24030381                           |
| Myeloid neoplasm | AML/MDS                               | 4  | 461  | M461D      | Insertion-Frameshift       | 24030381;<br>26438511                           |
| Myeloid neoplasm | AML                                   | 4  | 60   | T60M       | Substitution Missense      | 25596268                                        |
| Myeloid neoplasm | AML                                   | 4  | 86   | G86E       | Substitution Missense      | 25596268                                        |
| Myeloid neoplasm | AML                                   | 4  | 154  | G154*      | Substitution-Nonsense      | 24522528                                        |
| Myeloid neoplasm | AML                                   | 4  | 158  | S158Rfs*28 | Insertion-Frameshift       | 27276561                                        |
| Myeloid neoplasm | AML                                   | 4  | 165  | A165V      | Substitution Missense      | 27881874                                        |
| Myeloid neoplasm | AML                                   | 4  | 175  | K175R      | Deletion-Frameshift        | 27288520                                        |
| Myeloid neoplasm | AML                                   | 4  | 177  | S177P      | Deletion-Frameshift        | 25381062                                        |
| Myeloid neoplasm | AML                                   | 4  | 177  | S177T      | Substitution Missense      | 27288520                                        |
| Myeloid neoplasm | AML                                   | 4  | 179  | K175R      | Deletion-Frameshift        | 24923295                                        |
| Myeloid neoplasm | AML                                   | 4  | 195  | Y195Xfs*   | Insertion-Frameshift       | 27470916                                        |
| Myeloid neoplasm | AML                                   | 4  | 202  | A202S      | Substitution Missense      | 27288520                                        |
| Myeloid neoplasm | AML                                   | 4  | 209  | S209L      | Substitution Missense      | 27881874                                        |
| Myeloid neoplasm | AML                                   | 4  | 238  | C238*      | Substitution-Nonsense      | 27276561                                        |
| Myeloid neoplasm | AML                                   | 4  | 245  | L245T      | Deletion-Frameshift        | 22012066                                        |
| Myeloid neoplasm | AML                                   | 4  | 248  | P248R      | Deletion-Frameshift        | 22237025                                        |
| Myeloid neoplasm | AML                                   | 4  | 289  | W289L      | Insertion-Frameshift       | 22012066                                        |
| Myeloid neoplasm | AML                                   | 4  | 298  | P298L      | Deletion-Frameshift        | 26728869                                        |
| Myeloid neoplasm | AML                                   | 4  | 316  | P316S      | Substitution Missense      | 27881874                                        |
| Myeloid neoplasm | AML                                   | 4  | 340  | S340*      | Substitution-Nonsense      | 27276561                                        |

|                  |     |   |      |         |                            |                                                 |
|------------------|-----|---|------|---------|----------------------------|-------------------------------------------------|
| Myeloid neoplasm | AML | 4 | 342  | R342*   | Substitution-Nonsense      | 22012066;<br>30304655;<br>26773734;<br>29515765 |
| Myeloid neoplasm | AML | 4 | 346  | P346G   | Complex-Frameshift         | 27288520                                        |
| Myeloid neoplasm | AML | 4 | 346  | P346A   | Substitution Missense      | 24923295;<br>27288520                           |
| Myeloid neoplasm | AML | 4 | 346  | P346R   | Deletion-Frameshift        | 27288520                                        |
| Myeloid neoplasm | AML | 4 | 355  | S355R   | Deletion-Frameshift        | 27881874                                        |
| Myeloid neoplasm | AML | 4 | 355  | S355L   | Substitution Missense      | 27881874                                        |
| Myeloid neoplasm | AML | 4 | 369  | S369W   | Complex-Frameshift         | 22012066                                        |
| Myeloid neoplasm | AML | 4 | 378  | T368S   | Deletion-Frameshift        | 27288520                                        |
| Myeloid neoplasm | AML | 4 | 379  | V379A   | Deletion-Frameshift        | 27276561                                        |
| Myeloid neoplasm | AML | 4 | 400  | G400A   | Deletion-Frameshift        | 22012066                                        |
| Myeloid neoplasm | AML | 4 | 408  | G408R   | Substitution Missense      | 27881874                                        |
| Myeloid neoplasm | AML | 4 | 416  | Q416*   | Substitution-Nonsense      | 27288520                                        |
| Myeloid neoplasm | AML | 4 | 434  | K434L   | Insertion-Frameshift       | 27288520                                        |
| Myeloid neoplasm | AML | 4 | 460  | K460R   | Deletion-Frameshift        | 27435003                                        |
| Myeloid neoplasm | AML | 4 | 482  | I482del | Deletion in frame          | 27288520                                        |
| Myeloid neoplasm | AML | 4 | 488  | S488L   | Deletion-Frameshift        | 27288520                                        |
| Myeloid neoplasm | AML | 4 | 491  | G491S   | Insertion-Frameshift       | 27288520                                        |
| Myeloid neoplasm | AML | 4 | 502  | I502*   | Insertion-Frameshift       | 27288520                                        |
| Myeloid neoplasm | AML | 4 | 524  | S524K   | Insertion-Frameshift       | 24056718                                        |
| Myeloid neoplasm | AML | 4 | 534  | W534*   | Substitution-Nonsense      | 27288520                                        |
| Myeloid neoplasm | AML | 4 | 541  | S541F   | Insertion-Frameshift       | 25381062;<br>27276561                           |
| Myeloid neoplasm | AML | 4 | 543  | S543*   | Substitution-Nonsense      | 25381129                                        |
| Myeloid neoplasm | AML | 4 | 554  | I554S   | Deletion-Frameshift        | 27288520                                        |
| Myeloid neoplasm | AML | 4 | 555  | T555L   | Deletion-Frameshift        | 26438511                                        |
| Myeloid neoplasm | AML | 4 | 572  | P572T   | Insertion-Frameshift       | 27288520                                        |
| Myeloid neoplasm | AML | 4 | 586  | S586T   | Deletion-Frameshift        | 27288520                                        |
| Myeloid neoplasm | AML | 4 | 591  | T591R   | Substitution Missense      | NA                                              |
| Myeloid neoplasm | AML | 4 | 591  | T591=   | Substitution-coding silent | NA                                              |
| Myeloid neoplasm | AML | 4 | 596  | Q596*   | Substitution-Nonsense      | 27276561                                        |
| Myeloid neoplasm | AML | 4 | 654  | P654H   | Substitution Missense      | 24056718                                        |
| Myeloid neoplasm | AML | 4 | 674  | H674M   | Deletion-Frameshift        | 22012066;<br>27276561                           |
| Myeloid neoplasm | AML | 4 | 677  | G677H   | Complex-Frameshift         | 27288520                                        |
| Myeloid neoplasm | AML | 4 | 699  | K699S   | Insertion-Frameshift       | 27288520                                        |
| Myeloid neoplasm | AML | 4 | 702  | L702C   | Deletion-Frameshift        | 29674644;<br>27276561                           |
| Myeloid neoplasm | AML | 4 | 704  | Y704W   | Deletion-Frameshift        | 27288520                                        |
| Myeloid neoplasm | AML | 4 | 729  | L729Y   | Deletion-Frameshift        | 27288520                                        |
| Myeloid neoplasm | AML | 4 | 733  | T733A   | Deletion-Frameshift        | 22012066                                        |
| Myeloid neoplasm | AML | 4 | 755  | Y755*   | Insertion-Frameshift       | 26728869                                        |
| Myeloid neoplasm | AML | 4 | 755  | Y755*   | Substitution-Nonsense      | 27288520                                        |
| Myeloid neoplasm | AML | 4 | 756  | E756*   | Substitution-Nonsense      | 27276561                                        |
| Myeloid neoplasm | AML | 4 | 765  | S765P   | Deletion-Frameshift        | 27288520                                        |
| Myeloid neoplasm | AML | 4 | 793  | Q793*   | Substitution-Nonsense      | 22012066                                        |
| Myeloid neoplasm | AML | 4 | 810  | R810*   | Substitution Missense      | 27288520                                        |
| Myeloid neoplasm | AML | 4 | 830  | S830C   | Deletion-Frameshift        | 27276561                                        |
| Myeloid neoplasm | AML | 4 | 830  | S830K   | Insertion-Frameshift       | 27276561                                        |
| Myeloid neoplasm | AML | 4 | 836  | E836S   | Deletion-Frameshift        | 26728869                                        |
| Myeloid neoplasm | AML | 4 | 839  | K839Q   | Insertion-Frameshift       | 27288520;<br>24030381                           |
| Myeloid neoplasm | AML | 4 | 854  | A854T   | Substitution Missense      | 25596268                                        |
| Myeloid neoplasm | AML | 4 | 871  | F871*   | Insertion-Frameshift       | 31648334                                        |
| Myeloid neoplasm | AML | 4 | 876  | F876L   | Insertion-Frameshift       | 27288520                                        |
| Myeloid neoplasm | AML | 4 | 886  | G886R   | Insertion-Frameshift       | 22012066                                        |
| Myeloid neoplasm | AML | 4 | 895  | P859R   | Insertion-Frameshift       | 27276561                                        |
| Myeloid neoplasm | AML | 4 | 997  | A997H   | Deletion-Frameshift        | 29780592                                        |
| Myeloid neoplasm | AML | 4 | 939  | Y939L   | Insertion-Frameshift       | 22012066                                        |
| Myeloid neoplasm | AML | 4 | 957  | P957L   | Substitution Missense      | 27288520                                        |
| Myeloid neoplasm | AML | 4 | 965  | R965D   | Insertion-Frameshift       | 27288520                                        |
| Myeloid neoplasm | AML | 4 | 968  | N968T   | Deletion-Frameshift        | 27881874                                        |
| Myeloid neoplasm | AML | 4 | 975  | D975G   | Insertion-Frameshift       | 22012066                                        |
| Myeloid neoplasm | AML | 4 | 976  | R976*   | Substitution-Nonsense      | 27276561                                        |
| Myeloid neoplasm | AML | 5 | 1005 | E1005K  | Substitution Missense      | 27288520                                        |
| Myeloid neoplasm | AML | 6 | 1035 | H1035Q  | Insertion-Frameshift       | 26728869                                        |
| Myeloid neoplasm | AML | 6 | 1051 | W1051*  | Substitution-Nonsense      | 27276561                                        |
| Myeloid neoplasm | AML | 6 | 1074 | Q1074*  | Substitution-Nonsense      | 27276561                                        |
| Myeloid neoplasm | AML | 7 | 1089 | R1089H  | Insertion-Frameshift       | 22012066                                        |
| Myeloid neoplasm | AML | 7 | 1107 | V1107G  | Deletion-Frameshift        | 27276561                                        |
| Myeloid neoplasm | AML | 7 | 1110 | Q1110*  | Substitution-Nonsense      | 27288520                                        |
| Myeloid neoplasm | AML | 7 | 1115 | P1115T  | Deletion-Frameshift        | 22012066                                        |

|                  |                 |    |      |          |                       |                                                 |
|------------------|-----------------|----|------|----------|-----------------------|-------------------------------------------------|
| Myeloid neoplasm | AML             | 7  | 1122 | S1122L   | Substitution Missense | 24030381                                        |
| Myeloid neoplasm | AML             | 7  | 1131 | R1131L   | Substitution Missense | 27276561                                        |
| Myeloid neoplasm | AML             | 7  | 1164 | R1164*   | Substitution-Nonsense | 27288520                                        |
| Myeloid neoplasm | AML             | 8  | 1169 | L1169H   | Substitution Missense | NA                                              |
| Myeloid neoplasm | AML             | 8  | 1174 | Q1174T   | Insertion-Frameshift  | 27881874;<br>24030381                           |
| Myeloid neoplasm | AML             | 8  | 1174 | Q1174*   | Substitution-Nonsense | 27276561                                        |
| Myeloid neoplasm | AML             | 8  | 1183 | R1183*   | Substitution-Nonsense | 27288520,<br>27276561,<br>24030381              |
| Myeloid neoplasm | AML             | 8  | 1190 | A1190G   | Insertion-Frameshift  | 27276561                                        |
| Myeloid neoplasm | AML             | 8  | 1210 | E1210H   | Deletion-Frameshift   | 27276561                                        |
| Myeloid neoplasm | AML             | 8  | 1216 | T1216S   | Substitution Missense | 26980726                                        |
| Myeloid neoplasm | AML             | 8  | 1233 | N1233S   | Substitution Missense | 27288520                                        |
| Myeloid neoplasm | AML             | 8  | 1236 | W1236*   | Substitution-Nonsense | 27288520                                        |
| Myeloid neoplasm | AML             | 9  | 1288 | Q1288*   | Substitution-Nonsense | 27881874                                        |
| Myeloid neoplasm | AML             | 9  | 1302 | D1302E   | Substitution Missense | 25596268                                        |
| Myeloid neoplasm | AML             | 9  | 1323 | P1323H   | Deletion-Frameshift   | 27276561                                        |
| Myeloid neoplasm | AML             | 9  | 1329 | C1329Q   | Substitution Missense | 22012066                                        |
| Myeloid neoplasm | AML             | 9  | 1337 | Q1337S   | Insertion-Frameshift  | 27288520                                        |
| Myeloid neoplasm | AML             | 9  | 1343 | L1343I   | Insertion-Frameshift  | 22012066                                        |
| Myeloid neoplasm | AML             | 9  | 1350 | Y1350T   | Deletion-Frameshift   | 26728869                                        |
| Myeloid neoplasm | AML             | 9  | 1371 | S1371*   | Substitution-Nonsense | 27276561                                        |
| Myeloid neoplasm | AML             | 9  | 1375 | L1375R   | Insertion-Frameshift  | 27288520                                        |
| Myeloid neoplasm | AML             | 9  | 1389 | Q1389*   | Substitution-Nonsense | 27276561                                        |
| Myeloid neoplasm | AML             | 10 | 1411 | Q1411*   | Substitution-Nonsense | 27276561                                        |
| Myeloid neoplasm | AML             | 10 | 1419 | A1419S   | Substitution Missense | 27288520                                        |
| Myeloid neoplasm | AML             | 10 | 1425 | N1425S   | Substitution Missense | 28671688                                        |
| Myeloid neoplasm | AML             | 10 | 1451 | N1451K   | Deletion-Frameshift   | 22012066                                        |
| Myeloid neoplasm | AML             | 10 | 1452 | K1452G   | Complex-Frameshift    | 27288520                                        |
| Myeloid neoplasm | AML             | 10 | 1454 | C1454V   | Deletion-Frameshift   | 27276561                                        |
| Myeloid neoplasm | AML             | 10 | 1460 | D1460G   | Insertion-Frameshift  | 27288520                                        |
| Myeloid neoplasm | AML             | 10 | 1462 | A1462T   | Substitution Missense | 27881874                                        |
| Myeloid neoplasm | AML             | 10 | 1464 | Y1467del | Deletion in frame     | 27288520                                        |
| Myeloid neoplasm | AML             | 11 | 1480 | R1480*   | Substitution-Nonsense | 27288520,<br>27276561                           |
| Myeloid neoplasm | AML             | 11 | 1513 | R1513*   | Substitution-Nonsense | 18772396,<br>22012066,<br>24923295,<br>27288520 |
| Myeloid neoplasm | AML             | 11 | 1516 | L1516del | Deletion in frame     | 24047651                                        |
| Myeloid neoplasm | AML             | 11 | 1518 | Y1518W   | Deletion-Frameshift   | 27288520                                        |
| Myeloid neoplasm | AML             | 11 | 1518 | Y1518*   | Substitution-Nonsense | 27288520                                        |
| Myeloid neoplasm | AML             | 12 | 1541 | M1541I   | Insertion-Frameshift  | 24047651                                        |
| Myeloid neoplasm | AML             | 12 | 1547 | D1547H   | Substitution Missense | 27435003                                        |
| Myeloid neoplasm | AML             | 12 | 1561 | S1561M   | Deletion-Frameshift   | 27881874                                        |
| Myeloid neoplasm | AML             | 12 | 1564 | W1564*   | Substitution-Nonsense | 27276561                                        |
| Myeloid neoplasm | AML             | 12 | 1576 | D1576V   | Deletion-Frameshift   | 27276561                                        |
| Myeloid neoplasm | AML             | 13 | 1583 | L1583*   | Substitution-Nonsense | 27276561                                        |
| Myeloid neoplasm | AML             | 13 | 1595 | D1595V   | Deletion-Frameshift   | 27881874                                        |
| Myeloid neoplasm | AML             | 13 | 1596 | D1596R   | Deletion-Frameshift   | 27288520                                        |
| Myeloid neoplasm | AML             | 14 | 1608 | S1608*   | Substitution-Nonsense | 22012066                                        |
| Myeloid neoplasm | AML             | 14 | 1611 | P1611H   | Substitution Missense | 27881874                                        |
| Myeloid neoplasm | AML             | 14 | 1612 | L1612P   | Insertion-Frameshift  | 27288520                                        |
| Myeloid neoplasm | AML             | 14 | 1627 | R1627T   | Insertion-Frameshift  | 27288520                                        |
| Myeloid neoplasm | AML             | 14 | 1637 | K1637*   | Substitution-Nonsense | 22012066                                        |
| Myeloid neoplasm | AML             | 14 | 1651 | P1651Q   | Deletion-Frameshift   | 27276561                                        |
| Myeloid neoplasm | AML             | 15 | 1664 | Y1664*   | Substitution-Nonsense | 28481359,<br>27276561                           |
| Myeloid neoplasm | AML             | 15 | 1664 | Y1664I   | Deletion-Frameshift   | 27276561                                        |
| no tumor         | Aplastic anemia | 4  | 176  | Q176*    | Substitution-Nonsense | 25139356                                        |
| no tumor         | Aplastic anemia | 4  | 304  | Y304*    | Substitution-Nonsense | 25139356                                        |
| no tumor         | Aplastic anemia | 13 | 1587 | P1587fs  | Deletion-Frameshift   | 25139356                                        |
| no tumor         | Aplastic anemia | 14 | 1611 | W1611*   | Substitution-Nonsense | 25139356                                        |
| no tumor         | Aplastic anemia | 14 | 1612 | L1612fs  | Insertion-Frameshift  | 25139356                                        |

**Supplementary Table1.** BCOR Mutations detected in hematological disease



**Supplementary Table2. BCORL1 Mutations detected in hematological disease.**

| TUMOR             | SUBGROUP                                                          | EXON | Position a.a. | MUTATION | MUTATION TYPE                | Pubmed   |
|-------------------|-------------------------------------------------------------------|------|---------------|----------|------------------------------|----------|
| Lymphoid neoplasm | Diffuse large B cell lymphoma                                     | 4    | 440           | G440=    | Substitution - coding silent | 29386642 |
| Lymphoid neoplasm | Diffuse large B cell lymphoma                                     | 4    | 928           | P928A    | Substitution - Missense      | 21796119 |
| Lymphoid neoplasm | Diffuse large B cell lymphoma                                     | 5    | 1161          | K1161*   | Substitution nonsense        | 29386642 |
| Lymphoid neoplasm | Diffuse large B cell lymphoma                                     | 7    | 1332          | R1332*   | Substitution nonsense        | 24531327 |
| Lymphoid neoplasm | Diffuse large B cell lymphoma                                     | 11   | 1560          | Y1560D   | Substitution - Missense      | 29386642 |
| Lymphoid neoplasm | Breast implant associated anaplastic large cell lymphoma in situ  | 4    | 604           | P604L    | Substitution - Missense      | 31774495 |
| Lymphoid neoplasm | Breast implant associated anaplastic large cell lymphoma invasive | 7    | 1324          | E1324del | Deletion - In frame          | 31774495 |
| Lymphoid neoplasm | Lymphoid neoplasm                                                 | 4    | 945           | R945G    | Substitution - Missense      | -        |
| Lymphoid neoplasm | Lymphoid neoplasm                                                 | 4    | 971           | A971S    | Substitution - Missense      | -        |
| Lymphoid neoplasm | Chronic lymphocytic leukaemia-small lymphocytic lymphoma          | 4    | 208           | P208=    | Substitution - coding silent | -        |
| Lymphoid neoplasm | Chronic lymphocytic leukaemia-small lymphocytic lymphoma          | 13   | 1693          | E1693K   | Substitution - Missense      | 23415222 |
| Lymphoid neoplasm | Acute lymphoblastic B cell leukaemia                              | 2    | 6             | P6=      | Substitution - coding silent | 31697823 |
| Lymphoid neoplasm | Acute lymphoblastic B cell leukaemia                              | 4    | 216           | S216A    | Substitution - Missense      | 25207766 |
| Lymphoid neoplasm | Acute lymphoblastic B cell leukaemia                              | 4    | 1096          | V1096I   | Substitution - Missense      | 31697823 |
| Lymphoid neoplasm | Acute lymphoblastic B cell leukaemia                              | 13   | 1673          | G1673P   | Insertion-frameshift         | 25790293 |
| Lymphoid neoplasm | Acute lymphoblastic B cell leukaemia                              | 2    | 6             | P6=      | Substitution - coding silent | 31697823 |
| Lymphoid neoplasm | Acute lymphoblastic leukaemia                                     | 4    | 503           | P503S    | Substitution - Missense      | 26189108 |
| Lymphoid neoplasm | Plasma cell myeloma                                               | 4    | 407           | T407=    | Substitution - coding silent | 29386642 |
| Lymphoid neoplasm | Plasma cell myeloma                                               | 4    | 479           | P479H    | Substitution - Missense      | 29563506 |
| Lymphoid neoplasm | Plasma cell myeloma                                               | 4    | 530           | S530=    | Substitution - coding silent | 29563506 |
| Lymphoid neoplasm | Plasma cell myeloma                                               | 4    | 587           | T587N    | Substitution - Missense      | 29563506 |
| Lymphoid neoplasm | Plasma cell myeloma                                               | 4    | 671           | A671D    | Substitution - Missense      | 29563506 |
| Lymphoid neoplasm | Plasma cell myeloma                                               | 4    | 673           | G673V    | Substitution - Missense      | 30545397 |
| Lymphoid neoplasm | Plasma cell myeloma                                               | 4    | 688           | V688=    | Substitution - coding silent | 30545397 |
| Lymphoid neoplasm | Plasma cell myeloma                                               | 7    | 1251          | P1251H   | Substitution - Missense      | 29563506 |
| Lymphoid neoplasm | Plasma cell myeloma                                               | 7    | 1299          | R1299=   | Substitution - coding silent | 29563506 |
| Lymphoid neoplasm | Plasma cell myeloma                                               | 7    | 1301          | M1301I   | Substitution - Missense      | 29386642 |
| Lymphoid neoplasm | Plasma cell myeloma                                               | 7    | 1337          | S1337=   | Substitution - coding silent | 30545397 |
| Lymphoid neoplasm | Plasma cell myeloma                                               | 7    | 1349          | Q1349H   | Substitution - Missense      | 29563506 |
| Lymphoid neoplasm | Plasma cell myeloma                                               | 12   | 1594          | D1594E   | Substitution - Missense      | 29563506 |
| Lymphoid neoplasm | Plasma cell myeloma                                               | 13   | 1638          | I1638L   | Substitution - Missense      | 29386642 |
| Lymphoid neoplasm | Plasma cell myeloma                                               | 13   | 1664          | Q1664E   | Substitution - Missense      | 29563506 |
| Lymphoid neoplasm | Peripheral T cell lymphoma unspecified                            | 4    | 353           | P353L    | Substitution - Missense      | 25257991 |
| Lymphoid neoplasm | Angioimmunoblastic T cell lymphoma                                | 4    | 866           | V866I    | Substitution - Missense      | 27203213 |
| Lymphoid neoplasm | Angioimmunoblastic T cell lymphoma                                | 4    | 954           | E954G    | Insertion-frameshift         | 28671688 |
| Lymphoid neoplasm | Angioimmunoblastic T cell lymphoma                                | 4    | 1070          | G1070R   | Substitution - Missense      | 27203213 |
| Lymphoid neoplasm | Acute lymphoblastic T cell leukaemia                              | 4    | 533           | G533V    | Deletion-frameshift          | 28671688 |
| Lymphoid neoplasm | Acute lymphoblastic T cell leukaemia                              | 7    | 1349          | Q1349*   | Substitution nonsense        | 21989985 |
| Lymphoid neoplasm | Acute lymphoblastic T cell leukaemia                              | 13   | 1679          | S1679F   | Insertion-frameshift         | 28671688 |
| Myeloid neoplasm  | Acute leukaemia of ambiguous lineage                              | 4    | 327           | T327A    | Substitution - Missense      | -        |
| Myeloid neoplasm  | Acute lymphoblastic B cell leukaemia                              |      |               |          |                              | 27470916 |
| Myeloid neoplasm  | Acute myeloid leukaemia                                           | 4    | 945           | R945*    | Substitution nonsense        | 31697823 |
| Myeloid neoplasm  | Acute myeloid leukaemia therapy related                           |      |               |          |                              | 25652455 |
| Myeloid neoplasm  | Acute lymphoblastic T cell leukaemia                              | 4    | 1001          | Q1001P   | Insertion-frameshift         | 28671688 |
| Myeloid neoplasm  | Myelodysplastic syndrome                                          |      |               |          |                              | 27127180 |
| Myeloid neoplasm  | Peripheral T cell lymphoma unspecified                            | 4    | 1111          | T1111M   | Substitution - Missense      | 25257991 |
| Myeloid neoplasm  | Myelofibrosis                                                     | 5    | 1150          | K1150R   | Substitution - Missense      | 24325359 |
| Myeloid neoplasm  | Myelodysplastic-myeloproliferative neoplasm                       | 8    | 1432          | S1432*   | Substitution nonsense        | 26728869 |
| Myeloid neoplasm  | Myelodysplastic syndrome therapy related                          | 4    | 165           | R165L    | Insertion-frameshift         | 29386642 |
| Myeloid neoplasm  | Myelodysplastic syndrome therapy related                          | 4    | 397           | M397I    | Substitution - Missense      | 29386642 |
| Myeloid neoplasm  | Myelodysplastic syndrome                                          | 4    | 371           | T371P    | Substitution - Missense      | 30083851 |
| Myeloid neoplasm  | Myelodysplastic syndrome                                          | 5    | 1196          | R1196*   | Substitution nonsense        | 24047651 |
| Myeloid neoplasm  | Myelodysplastic syndrome                                          | 7    | 1265          | R1265H   | Substitution - Missense      | 27127180 |
| Myeloid neoplasm  | Myelodysplastic syndrome                                          | 12   | 1601          | S1601F   | Insertion-frameshift         | 26728869 |
| Myeloid neoplasm  | Chronic myelomonocytic leukaemia                                  | 4    | 72            | R72FS    | Frameshift                   | 24047651 |
| Myeloid neoplasm  | Acute myeloid leukaemia                                           |      |               |          |                              | 21989985 |
| Myeloid neoplasm  | Chronic myelomonocytic leukaemia                                  | 4    | 1001          | Q1001R   | Deletion-frameshift          | 25652455 |
| Myeloid neoplasm  | Acute leukaemic transformation of myeloproliferative neoplasm     | 12   | 1599          | E1599D   | Deletion-frameshift          | 29148089 |
| Myeloid neoplasm  | Acute myeloid leukaemia associated with MDS                       | 4    | 188           | T188D    | Insertion-frameshift         | 21989985 |
| Myeloid neoplasm  | Acute myeloid leukaemia associated with MDS                       | 4    | 239           | V239S    | Insertion-frameshift         | 29780592 |
| Myeloid neoplasm  | Acute myeloid leukaemia associated with MDS                       | 4    | 644           | M644H    | Insertion-frameshift         | 21989985 |
| Myeloid neoplasm  | Acute myeloid leukaemia associated with MDS                       | 4    | 754           | I754fs   | Frameshift                   | 24047651 |
| Myeloid neoplasm  | Acute myeloid leukaemia associated with MDS                       | 4    | 810           | P810T    | Substitution - Missense      | 21989985 |
| Myeloid neoplasm  | Acute myeloid leukaemia associated with MDS                       | 13   | 1679          | S1679fs  | Frameshift                   | 24047651 |
| Myeloid neoplasm  | Acute leukaemic transformation of myeloproliferative neoplasm     | 12   | 1599          | E1599D   | Deletion-frameshift          | 29148089 |
| Myeloid neoplasm  | Acute myeloid leukaemia                                           | 4    | 96            | Q96R     | Substitution - Missense      | -        |
| Myeloid neoplasm  | Acute myeloid leukaemia                                           | 4    | 114           | P114L    | Substitution - Missense      | 27470916 |
| Myeloid neoplasm  | Acute myeloid leukaemia                                           | 4    | 127           | S127F    | Substitution - Missense      | 28063196 |
| Myeloid neoplasm  | Acute myeloid leukaemia                                           | 4    | 149           | S149G    | Insertion-frameshift         | 27881874 |
| Myeloid neoplasm  | Acute myeloid leukaemia                                           | 4    | 149           | S149G    | Insertion-frameshift         | 26980726 |

|                  |                         |    |      |          |                         |          |
|------------------|-------------------------|----|------|----------|-------------------------|----------|
| Myeloid neoplasm | Acute myeloid leukaemia | 4  | 158  | G158*    | Substitution nonsense   | 25596268 |
| Myeloid neoplasm | Acute myeloid leukaemia | 4  | 174  | F174W    | Insertion-frameshift    | 27288520 |
| Myeloid neoplasm | Acute myeloid leukaemia | 4  | 209  | G209S    | Substitution - Missense | 26438511 |
| Myeloid neoplasm | Acute myeloid leukaemia | 4  | 226  | S229R    | Deletion-frameshift     | 27470916 |
| Myeloid neoplasm | Acute myeloid leukaemia | 4  | 260  | P260S    | Substitution - Missense | 28063196 |
| Myeloid neoplasm | Acute myeloid leukaemia | 4  | 265  | V265M    | Substitution - Missense | 25962120 |
| Myeloid neoplasm | Acute myeloid leukaemia | 4  | 324  | S324*    | Substitution nonsense   | 27288520 |
| Myeloid neoplasm | Acute myeloid leukaemia | 4  | 389  | I389L    | Substitution - Missense | 27288520 |
| Myeloid neoplasm | Acute myeloid leukaemia | 4  | 437  | F437fs   | Frameshift              | 29663558 |
| Myeloid neoplasm | Acute myeloid leukaemia | 4  | 447  | T447fs   | Frameshift              | 28063196 |
| Myeloid neoplasm | Acute myeloid leukaemia | 4  | 452  | I452S    | Deletion-frameshift     | 26980726 |
| Myeloid neoplasm | Acute myeloid leukaemia | 4  | 477  | T477fs   | Frameshift              | 29663558 |
| Myeloid neoplasm | Acute myeloid leukaemia | 4  | 521  | L521R    | Deletion-frameshift     | 27288520 |
| Myeloid neoplasm | Acute myeloid leukaemia | 4  | 538  | Q538*    | Substitution nonsense   | 21989985 |
| Myeloid neoplasm | Acute myeloid leukaemia | 4  | 553  | L553P    | Insertion-frameshift    | 27881874 |
| Myeloid neoplasm | Acute myeloid leukaemia | 4  | 559  | K559N    | Substitution - Missense | 27881874 |
| Myeloid neoplasm | Acute myeloid leukaemia | 4  | 590  | Q590*    | Substitution nonsense   | 29663558 |
| Myeloid neoplasm | Acute myeloid leukaemia | 4  | 596  | V596fs   | Frameshift              | 29663558 |
| Myeloid neoplasm | Acute myeloid leukaemia | 4  | 609  | R609*    | Substitution nonsense   | 27881874 |
| Myeloid neoplasm | Acute myeloid leukaemia | 4  | 613  | S613P    | Substitution - Missense | 26438511 |
| Myeloid neoplasm | Acute myeloid leukaemia | 4  | 614  | P614T    | Deletion-frameshift     | 26438511 |
| Myeloid neoplasm | Acute myeloid leukaemia | 4  | 616  | E616*    | Substitution nonsense   | 29663558 |
| Myeloid neoplasm | Acute myeloid leukaemia | 4  | 644  | M644C    | Deletion-frameshift     | 27288520 |
| Myeloid neoplasm | Acute myeloid leukaemia | 4  | 657  | L657F    | Substitution - Missense | 27881874 |
| Myeloid neoplasm | Acute myeloid leukaemia | 4  | 702  | W702*    | Substitution nonsense   | 27288520 |
| Myeloid neoplasm | Acute myeloid leukaemia | 4  | 703  | V703M    | Substitution - Missense | 27881874 |
| Myeloid neoplasm | Acute myeloid leukaemia | 4  | 765  | T765M    | Substitution - Missense | 27881874 |
| Myeloid neoplasm | Acute myeloid leukaemia | 4  | 767  | G767A    | Deletion-frameshift     | 27881874 |
| Myeloid neoplasm | Acute myeloid leukaemia | 4  | 780  | S780N    | Substitution - Missense | 27881874 |
| Myeloid neoplasm | Acute myeloid leukaemia | 4  | 784  | R784*    | Substitution nonsense   | 21989985 |
| Myeloid neoplasm | Acute myeloid leukaemia | 4  | 784  | R784*    | Substitution nonsense   | 27288520 |
| Myeloid neoplasm | Acute myeloid leukaemia | 4  | 784  | R784*    | Substitution nonsense   | 28825729 |
| Myeloid neoplasm | Acute myeloid leukaemia | 4  | 851  | Q851K    | Substitution - Missense | 29663558 |
| Myeloid neoplasm | Acute myeloid leukaemia | 4  | 916  | E916*    | Substitution nonsense   | 26980726 |
| Myeloid neoplasm | Acute myeloid leukaemia | 4  | 948  | Q948fs   | Frameshift              | 29663558 |
| Myeloid neoplasm | Acute myeloid leukaemia | 4  | 971  | A971G    | Insertion-frameshift    | 27435003 |
| Myeloid neoplasm | Acute myeloid leukaemia | 4  | 1006 | M1006I   | Insertion-frameshift    | 27288520 |
| Myeloid neoplasm | Acute myeloid leukaemia | 4  | 1048 | R1048*   | Substitution nonsense   | 28063196 |
| Myeloid neoplasm | Acute myeloid leukaemia | 4  | 1085 | K1085R   | Deletion-frameshift     | 21989985 |
| Myeloid neoplasm | Acute myeloid leukaemia | 4  | 1090 | R1090*   | Substitution nonsense   | 29663558 |
| Myeloid neoplasm | Acute myeloid leukaemia | 4  | 1102 | K1102*   | Substitution nonsense   | 27288520 |
| Myeloid neoplasm | Acute myeloid leukaemia | 4  | 1111 | T1111M   | Substitution - Missense | 29663558 |
| Myeloid neoplasm | Acute myeloid leukaemia | 4  | 1112 | E1112*   | Substitution nonsense   | 25652455 |
| Myeloid neoplasm | Acute myeloid leukaemia | 4  | 1115 | P1115S   | Substitution - Missense | -        |
| Myeloid neoplasm | Acute myeloid leukaemia | 4  | 1116 | P1116S   | Substitution - Missense | 27470916 |
| Myeloid neoplasm | Acute myeloid leukaemia | 4  | 1137 | K1137*   | Substitution nonsense   | 29663558 |
| Myeloid neoplasm | Acute myeloid leukaemia | 5  | 1158 | S1158A   | Substitution - Missense | 25652455 |
| Myeloid neoplasm | Acute myeloid leukaemia | 5  | 1166 | A1166G   | Insertion-frameshift    | 27288520 |
| Myeloid neoplasm | Acute myeloid leukaemia | 5  | 1196 | R1196*   | Substitution nonsense   | 27288520 |
| Myeloid neoplasm | Acute myeloid leukaemia | 5  | 1201 | E1201A   | Substitution - Missense | 26980726 |
| Myeloid neoplasm | Acute myeloid leukaemia | 7  | 1257 | E1257del | Deletion - In frame     | 29663558 |
| Myeloid neoplasm | Acute myeloid leukaemia | 7  | 1297 | R1297*   | Substitution nonsense   | 27288520 |
| Myeloid neoplasm | Acute myeloid leukaemia | 8  | 1370 | S1370P   | Substitution - Missense | 26438511 |
| Myeloid neoplasm | Acute myeloid leukaemia | 8  | 1391 | G1391R   | Substitution - Missense | 29663558 |
| Myeloid neoplasm | Acute myeloid leukaemia | 8  | 1420 | R1420N   | Insertion-frameshift    | 27288520 |
| Myeloid neoplasm | Acute myeloid leukaemia | 8  | 1420 | R1420*   | Substitution nonsense   | 27288520 |
| Myeloid neoplasm | Acute myeloid leukaemia | 8  | 1431 | S1431P   | Substitution - Missense | 27798625 |
| Myeloid neoplasm | Acute myeloid leukaemia | 10 | 1520 | Y1520*   | Substitution nonsense   | 29663558 |
| Myeloid neoplasm | Acute myeloid leukaemia | 11 | 1542 | L1542F   | Substitution - Missense | 29663558 |
| Myeloid neoplasm | Acute myeloid leukaemia | 11 | 1551 | G1551V   | Deletion - In frame     | 27881874 |
| Myeloid neoplasm | Acute myeloid leukaemia | 13 | 1655 | E1655A   | Insertion-frameshift    | 26980726 |
| Myeloid neoplasm | Acute myeloid leukaemia | 13 | 1655 | E1655S   | Complex- frameshift     | 26980726 |
| Myeloid neoplasm | Acute myeloid leukaemia | 13 | 1659 | Q1659P   | Insertion-frameshift    | 27288520 |
| Myeloid neoplasm | Acute myeloid leukaemia | 13 | 1681 | P1681Q   | Deletion-frameshift     | 26438511 |
